# Supplementary material for: Possibility of Using By-Products with High NDF Content to Alter the Fecal Short Chain Fatty Acid Profiles, Bacterial Community, and Digestibility of Lactating Dairy Cows
Source: MDPI journal article supplement (doi:10.3390/microorganisms10091731), 2022-08-27
Supplement: s1 [file s1]

Supplementary Table

Table S1. Ingredient composition of treatment diets fed to lactating cows (% of DM)

| Item                                                         | Treatment diets <sup>1</sup> |      |      |      |
|--------------------------------------------------------------|------------------------------|------|------|------|
|                                                              | CON                          | LN   | MN   | HN   |
| Soybean hull                                                 | 0                            | 0.83 | 1.67 | 2.50 |
| Beet pulp pellet                                             | 0                            | 0.84 | 1.66 | 2.50 |
| Alfalfa hay                                                  | 12.3                         | 11.4 | 10.3 | 9.2  |
| Oat hay                                                      | 4.38                         | 3.76 | 3.00 | 2.42 |
| Whole corn silage                                            | 23.8                         | 23.2 | 22.8 | 22.3 |
| Alfalfa silage                                               | 2.60                         | 2.60 | 2.60 | 2.60 |
| Extruded soybean meal                                        | 2.03                         | 2.03 | 2.07 | 2.09 |
| Soybean meal                                                 | 7.11                         | 7.18 | 7.25 | 7.32 |
| Steam-flaked corn                                            | 27.5                         | 27.7 | 27.8 | 28.0 |
| Double-low(low erucic acid, low glucosinolate) rapeseed meal | 8.32                         | 8.41 | 8.48 | 8.57 |
| DDGS(distillers dried grains with soluble)                   | 0.51                         | 0.53 | 0.54 | 0.55 |
| Whole cotton seed                                            | 4.17                         | 4.31 | 4.45 | 4.58 |
| Wheat bran                                                   | 1.07                         | 1.09 | 1.10 | 1.11 |
| Mineral-vitamin premix <sup>2</sup>                          | 4.02                         | 4.06 | 4.10 | 4.14 |
| Fatty acid calcium <sup>3</sup>                              | 0.62                         | 0.60 | 0.60 | 0.58 |
| Fatty powder <sup>4</sup>                                    | 0.93                         | 0.90 | 0.90 | 0.89 |
| Wet cane molasses                                            | 0.66                         | 0.67 | 0.69 | 0.71 |

<sup>1</sup>CON (control, no by-products); low by-products (1.67%) (LB: 0.83% SH + 0.84% BP); medium by-products (3.33%) (MB: 1.67% SH + 1.66% BP), and high by-products (5%) (HB: 2.5% SH + 2.5% BP) (DM basis).

<sup>2</sup>The premix for lactating cows contained (per kilogram of DM): 150,000 IU Vitamin A, 35,000 IU Vitamin D, 2,000 IU Vitamin E, 250 mg Cu, 500 mg Mn, 1,000 mg Zn, 20 mg Se, 40 mg I, 25 mg Co.

<sup>3</sup>Fatty acid calcium contained  $\geq 82.5\%$  ether extract,  $\geq 8\%$  Ca and  $\leq 10\%$  ash.

<sup>4</sup> Fatty powder contained  $\geq 99.5\%$  ether extract.
